# Supplementary material for: Defectors Can Create Conditions That Rescue Cooperation
Source: PubMed Central journal article supplement (PMC4687000; doi:10.1371/journal.pcbi.1004645), 2015-12-21
Supplement: pcbi.1004645.s008.pdf [file pcbi.1004645.s008.pdf]

# 1 Calculation of the maximum probability of survival of a single cell

2 Consider an individual  $C$  cell placed in a location with no resource. We want to estimate  $\Pr(\varepsilon)$ , the  
3 minimal probability that the entire population goes extinct when its release rate is very high. In general,  
4 this will be the probability that the cell does not divide and goes extinct, plus the probability that the  
5 cell divides once and both cells go extinct, etc. Let  $b$  be the number of births before population  
6 extinction, then

$$\Pr(\varepsilon) = \Pr(\varepsilon|b=0) + \Pr(\varepsilon|b=1) + \dots + \Pr(\varepsilon|b=n). \quad (1)$$

7 As each term becomes less and less likely to occur, we calculate a lower bound on this probability by  
8 only considering the first two terms.

9 In the first time step  $\Delta t$ , the cell will see no resource, and  $\Pr(\varepsilon)$  is simply the probability of death,  $p_d$ . If  
10 this cell survives, suppose that it has a probability  $p_b$  of giving birth in the next time step. Then in the  
11 next time step, the probability of death before cell division becomes  $(1-p_d)(1-p_b)p_d$ . Continuing, we get

$$\Pr(\varepsilon|b=0) = p_d \left[ 1 + [(1-p_d)(1-p_b)]^1 + [(1-p_d)(1-p_b)]^2 + \dots + [(1-p_d)(1-p_b)]^i \right]. \quad (2)$$

12 Rearranging gives

$$\Pr(\varepsilon|b=0) = p_d \sum_0^{\infty} [(1-p_d)(1-p_b)]^i = \frac{p_d}{p_d + p_b - p_b p_d}. \quad (3)$$

13 The maximum birth rate was  $0.45 \text{ hr}^{-1}$ , the death rate was  $0.1 \text{ hr}^{-1}$ , and the time step was 0.005. Thus,  $p_b$   
14 = 0.00225,  $p_d = 5 \times 10^{-4}$ , and  $\Pr(\varepsilon|b=0) = 0.1819$ . Similarly, we can estimate a lower bound for  $\Pr(\varepsilon|b=1)$   
15 using the results for  $\Pr(\varepsilon|b=0)$ . Let  $x = \Pr(\varepsilon|b=0)$ , then

$$\Pr(\varepsilon|b=1) > (1-p_d) p_b x^2 \left[ 1 + [(1-p_b)(1-p_d)]^1 + \dots + [(1-p_b)(1-p_d)]^i \right]. \quad (4)$$

16 Therefore,

$$\Pr(\varepsilon|b=1) > (1-p_d) p_b x^2 \sum_{i=0}^{\infty} [(1-p_b)(1-p_d)]^i = \frac{(1-p_d) p_b x^2}{p_d + p_b - p_b p_d}. \quad (5)$$

17 Thus,  $\Pr(\varepsilon|b=1) > 0.027$  and  $\Pr(\varepsilon) > 0.2089$ . The fit in Fig. 2B predicts an  $\varepsilon$  of  $\sim 0.23$ . Five additional  
 18 experiments were run with 1024 initial cells and a very high release rate of  $10^5$  units/hr. The number of  
 19 extinctions were 226, 229, 223, 234, and 219, for a mean extinction frequency of  $0.22 \pm 0.005$  (2x  
 20 SEM).
