# Supplementary material for: Defectors Can Create Conditions That Rescue Cooperation
Source: PubMed Central journal article supplement (PMC4687000; doi:10.1371/journal.pcbi.1004645), 2015-12-21
Supplement: pcbi.1004645.s009.pdf [file pcbi.1004645.s009.pdf]

## 1 Calculation of the expected slope for growth rate versus release rate

2 When resource level  $S$  reaches a steady state, the population grows at a constant rate. Setting  $dS/dt=0$  in

3 Eq (3), we get  $\beta_{ij}(1-N/\kappa) - \gamma b_{ij}(S) = 0$  for a pure population of ancestral or evolved cooperators.

4 At a population size significantly below the carrying capacity, this becomes  $b_{ij}(S) = \beta_{ij}/\gamma$ .

5 Thus, the net growth rate is  $\beta_{ij}/\gamma - d$ . When the net growth rate is plotted against  $\beta_{ij}$ , we obtain a

6 line with slope  $1/\gamma$  and intercept  $-d$ . Since  $\gamma = 5.5$  units/cell, the predicted slope is 0.1818 cells per unit

7 of resource, which falls in our 95% CI of 0.180 – 0.182.
